# Supplementary material
Source: Springer Nature journal article supplement (https://www.springermedizin.de/resource/supplementary/12916_2013_840_MOESM1_ESM.pdf/9598426)
Supplement: MOESM1 [file 9598426]

## USA dataset

| Blood test     | ICD code | ICD description                                                   |
|----------------|----------|-------------------------------------------------------------------|
| PLATELET COUNT | 038      | Septicemia                                                        |
| PLATELET COUNT | 197      | Secondary malignant neoplasm of respiratory and digestive systems |
| PLATELET COUNT | 511      | Pleurisy                                                          |
| PLATELET COUNT | 567      | Peritonitis and retroperitoneal infections                        |
| PLATELET COUNT | 707      | Chronic ulcer of skin                                             |
| PLATELET COUNT | Z54      | Other operations on abdominal region                              |
| PLATELET COUNT | Z86      | Operations on skin and subcutaneous tissue                        |
| PLATELET COUNT | Z99      | Other nonoperative procedures                                     |
| HEMATOCRIT     | 204      | Lymphoid leukemia                                                 |
| HEMATOCRIT     | 205      | Myeloid leukemia                                                  |
| HEMATOCRIT     | 280      | Iron deficiency anemias                                           |
| HEMATOCRIT     | 282      | Hereditary hemolytic anemias                                      |
| HEMATOCRIT     | 283      | Acquired hemolytic anemias                                        |
| HEMATOCRIT     | 284      | Aplastic anemia and other bone marrow failure syndromes           |
| HEMATOCRIT     | 285      | Other and unspecified anemias                                     |
| HEMATOCRIT     | 288      | Diseases of white blood cells                                     |
| HEMATOCRIT     | 455      | Hemorrhoids                                                       |
| HEMATOCRIT     | 531      | Gastric ulcer                                                     |
| HEMATOCRIT     | 532      | Duodenal ulcer                                                    |
| HEMATOCRIT     | 537      | Other disorders of stomach and duodenum                           |
| HEMATOCRIT     | 569      | Other disorders of intestine                                      |
| HEMATOCRIT     | 578      | Gastrointestinal hemorrhage                                       |
| HEMATOCRIT     | Z38      | Incision, excision, and occlusion of vessels                      |
| HEMATOCRIT     | Z41      | Operations on bone marrow and spleen                              |
| HEMATOCRIT     | Z44      | Other operations on stomach                                       |
| HEMATOCRIT     | Z45      | Incision, excision, and anastomosis of intestine                  |
| HEMATOCRIT     | Z99      | Other nonoperative procedures                                     |
| HEMOGLOBIN     | 205      | Myeloid leukemia                                                  |
| HEMOGLOBIN     | 280      | Iron deficiency anemias                                           |
| HEMOGLOBIN     | 283      | Acquired hemolytic anemias                                        |
| HEMOGLOBIN     | 284      | Aplastic anemia and other bone marrow failure syndromes           |
| HEMOGLOBIN     | 285      | Other and unspecified anemias                                     |
| HEMOGLOBIN     | 531      | Gastric ulcer                                                     |
| HEMOGLOBIN     | 532      | Duodenal ulcer                                                    |
| HEMOGLOBIN     | 537      | Other disorders of stomach and duodenum                           |
| HEMOGLOBIN     | 569      | Other disorders of intestine                                      |
| HEMOGLOBIN     | 578      | Gastrointestinal hemorrhage                                       |
| HEMOGLOBIN     | Z41      | Operations on bone marrow and spleen                              |
| HEMOGLOBIN     | Z44      | Other operations on stomach                                       |
| HEMOGLOBIN     | Z45      | Incision, excision, and anastomosis of intestine                  |
| HEMOGLOBIN     | Z99      | Other nonoperative procedures                                     |

|     |     |                                                                   |
|-----|-----|-------------------------------------------------------------------|
| RBC | 205 | Myeloid leukemia                                                  |
| RBC | 280 | Iron deficiency anemias                                           |
| RBC | 282 | Hereditary hemolytic anemias                                      |
| RBC | 283 | Acquired hemolytic anemias                                        |
| RBC | 284 | Aplastic anemia and other bone marrow failure syndromes           |
| RBC | 285 | Other and unspecified anemias                                     |
| RBC | 288 | Diseases of white blood cells                                     |
| RBC | 531 | Gastric ulcer                                                     |
| RBC | 532 | Duodenal ulcer                                                    |
| RBC | 537 | Other disorders of stomach and duodenum                           |
| RBC | 578 | Gastrointestinal hemorrhage                                       |
| RBC | Z38 | Incision, excision, and occlusion of vessels                      |
| RBC | Z41 | Operations on bone marrow and spleen                              |
| RBC | Z44 | Other operations on stomach                                       |
| RBC | Z45 | Incision, excision, and anastomosis of intestine                  |
| RBC | Z99 | Other nonoperative procedures                                     |
| WBC | 038 | Septicemia                                                        |
| WBC | 204 | Lymphoid leukemia                                                 |
| WBC | 205 | Myeloid leukemia                                                  |
| WBC | 518 | Other diseases of lung                                            |
| WBC | Z41 | Operations on bone marrow and spleen                              |
| WBC | Z99 | Other nonoperative procedures                                     |
| MCV | 070 | Viral hepatitis                                                   |
| MCV | 280 | Iron deficiency anemias                                           |
| MCV | 517 | Lung involvement in conditions classified elsewhere               |
| MCV | 571 | Chronic liver disease and cirrhosis                               |
| MCV | 572 | Liver abscess and sequelae of chronic liver disease               |
| MCV | Z45 | Incision, excision, and anastomosis of intestine                  |
| MCV | Z54 | Other operations on abdominal region                              |
| RDW | 070 | Viral hepatitis                                                   |
| RDW | 197 | Secondary malignant neoplasm of respiratory and digestive systems |
| RDW | 280 | Iron deficiency anemias                                           |
| RDW | 282 | Hereditary hemolytic anemias                                      |
| RDW | 284 | Aplastic anemia and other bone marrow failure syndromes           |
| RDW | 511 | Pleurisy                                                          |
| RDW | 517 | Lung involvement in conditions classified elsewhere               |
| RDW | 518 | Other diseases of lung                                            |
| RDW | 572 | Liver abscess and sequelae of chronic liver disease               |
| RDW | Z39 | Other operations on vessels                                       |
| RDW | Z41 | Operations on bone marrow and spleen                              |
| RDW | Z45 | Incision, excision, and anastomosis of intestine                  |
| RDW | Z54 | Other operations on abdominal region                              |
| RDW | Z99 | Other nonoperative procedures                                     |

|                  |     |                                                         |
|------------------|-----|---------------------------------------------------------|
| NEUT, ABS        | 038 | Septicemia                                              |
| NEUT, ABS        | 486 | Pneumonia, organism unspecified                         |
| NEUT, ABS        | 507 | Pneumonitis due to solids and liquids                   |
| NEUT, ABS        | 518 | Other diseases of lung                                  |
| NEUT, ABS        | Z38 | Incision, excision, and occlusion of vessels            |
| NEUT, ABS        | Z96 | Nonoperative intubation and irrigation                  |
| LYM, ABS         | 204 | Lymphoid leukemia                                       |
| MONO, ABS        | 038 | Septicemia                                              |
| MONO, ABS        | 282 | Hereditary hemolytic anemias                            |
| MONO, ABS        | 486 | Pneumonia, organism unspecified                         |
| EOS, ABS         | 282 | Hereditary hemolytic anemias                            |
| EOS, ABS         | 585 | Chronic kidney disease (CKD)                            |
| EOS, ABS         | Z39 | Other operations on vessels                             |
| BASOS, ABS       | 282 | Hereditary hemolytic anemias                            |
| NEUT, %          | 204 | Lymphoid leukemia                                       |
| NEUT, %          | 205 | Myeloid leukemia                                        |
| NEUT, %          | 284 | Aplastic anemia and other bone marrow failure syndromes |
| NEUT, %          | 288 | Diseases of white blood cells                           |
| NEUT, %          | 291 | Alcohol-induced mental disorders                        |
| NEUT, %          | 296 | Episodic mood disorders                                 |
| NEUT, %          | 303 | Alcohol dependence syndrome                             |
| NEUT, %          | 307 | Special symptoms or syndromes, not elsewhere classified |
| LYM, %           | 204 | Lymphoid leukemia                                       |
| LYM, %           | 205 | Myeloid leukemia                                        |
| LYM, %           | 284 | Aplastic anemia and other bone marrow failure syndromes |
| LYM, %           | 287 | Purpura and other hemorrhagic conditions                |
| LYM, %           | 288 | Diseases of white blood cells                           |
| LYM, %           | 291 | Alcohol-induced mental disorders                        |
| LYM, %           | 296 | Episodic mood disorders                                 |
| LYM, %           | 307 | Special symptoms or syndromes, not elsewhere classified |
| MONO, %          | 070 | Viral hepatitis                                         |
| MONO, %          | 288 | Diseases of white blood cells                           |
| MONO, %          | 572 | Liver abscess and sequelae of chronic liver disease     |
| MONO, %          | Z54 | Other operations on abdominal region                    |
| MONO, %          | Z99 | Other nonoperative procedures                           |
| TROPONIN I, POCT | 410 | Acute myocardial infarction                             |
| TROPONIN I, POCT | Z00 | Procedures and interventions, Not Elsewhere Classified  |
| TROPONIN I, POCT | Z36 | Operations on vessels of heart                          |
| LACTATE, ISTAT   | 038 | Septicemia                                              |
| LACTATE, ISTAT   | 518 | Other diseases of lung                                  |
| LACTATE, ISTAT   | Z96 | Nonoperative intubation and irrigation                  |

ISR dataset

| <b>Blood test</b>         | <b>ICD code</b> | <b>ICD description</b>                                                      |
|---------------------------|-----------------|-----------------------------------------------------------------------------|
| Standard Base Excess      | 584             | Acute kidney failure                                                        |
| Standard Base Excess      | 585             | Chronic kidney disease (CKD)                                                |
| Bilirubin Total           | 070             | Viral hepatitis                                                             |
| Bilirubin Total           | 157             | Malignant neoplasm of pancreas                                              |
| Bilirubin Total           | 571             | Chronic liver disease and cirrhosis                                         |
| Bilirubin Total           | 572             | Liver abscess and sequelae of chronic liver disease                         |
| Bilirubin Total           | 576             | Other disorders of biliary tract                                            |
| Bilirubin Total           | Z54             | Other operations on abdominal region                                        |
| Calcium                   | 038             | Septicemia                                                                  |
| Calcium                   | 197             | Secondary malignant neoplasm of respiratory and digestive systems           |
| Calcium                   | 275             | Disorders of mineral metabolism                                             |
| Creatinine                | 403             | Hypertensive chronic kidney disease                                         |
| Creatinine                | 584             | Acute kidney failure                                                        |
| Creatinine                | 585             | Chronic kidney disease (CKD)                                                |
| Creatinine                | V45             | Other postprocedural states                                                 |
| Creatinine                | Z39             | Other operations on vessels                                                 |
| Glucose                   | 250             | Diabetes mellitus                                                           |
| Glucose                   | 270             | Disorders of amino-acid transport and metabolism                            |
| Glucose                   | 357             | Inflammatory and toxic neuropathy                                           |
| Glutamic Oxaloacetic Tran | 573             | Other disorders of liver                                                    |
| Glutamic Pyruvic Transam  | 573             | Other disorders of liver                                                    |
| Glutamic Pyruvic Transam  | 576             | Other disorders of biliary tract                                            |
| Hco3                      | 584             | Acute kidney failure                                                        |
| Hemoglobin                | 238             | Neoplasm of uncertain behavior of other and unspecified sites and tissues   |
| Hemoglobin                | 280             | Iron deficiency anemias                                                     |
| Hemoglobin                | 281             | Other deficiency anemias                                                    |
| Hemoglobin                | 285             | Other and unspecified anemias                                               |
| Hemoglobin                | 535             | Gastritis and duodenitis                                                    |
| Hemoglobin                | 553             | Other hernia of abdominal cavity without mention of obstruction or gangrene |
| Hemoglobin                | 578             | Gastrointestinal hemorrhage                                                 |
| Hemoglobin                | Z99             | Other nonoperative procedures                                               |
| Lactic Dehydrogenase      | 172             | Malignant melanoma of skin                                                  |
| Lactic Dehydrogenase      | 185             | Malignant neoplasm of prostate                                              |
| Lactic Dehydrogenase      | 197             | Secondary malignant neoplasm of respiratory and digestive systems           |
| Lactic Dehydrogenase      | 198             | Secondary malignant neoplasm of other specified sites                       |
| Lactic Dehydrogenase      | 202             | Other malignant neoplasms of lymphoid and histiocytic tissue                |
| Lactic Dehydrogenase      | 204             | Lymphoid leukemia                                                           |
| Lactic Dehydrogenase      | 208             | Leukemia of unspecified cell type                                           |
| Lactic Dehydrogenase      | 209             | Neuroendocrine tumors                                                       |
| Lactic Dehydrogenase      | 410             | Acute myocardial infarction                                                 |

|                          |     |                                                                                |
|--------------------------|-----|--------------------------------------------------------------------------------|
| Absolute Neutrophil Coun | 038 | Septicemia                                                                     |
| Absolute Neutrophil Coun | 041 | Bacterial infection in conditions classified elsewhere and of unspecified site |
| Absolute Neutrophil Coun | 486 | Pneumonia, organism unspecified                                                |
| Absolute Neutrophil Coun | 599 | Other disorders of urethra and urinary tract                                   |
| Phosphorus               | 038 | Septicemia                                                                     |
| Phosphorus               | 403 | Hypertensive chronic kidney disease                                            |
| Phosphorus               | 514 | Pulmonary congestion and hypostasis                                            |
| Phosphorus               | 584 | Acute kidney failure                                                           |
| Phosphorus               | 585 | Chronic kidney disease (CKD)                                                   |
| Phosphorus               | 586 | Renal failure, unspecified                                                     |
| Phosphorus               | 296 | Nonoperative intubation and irrigation                                         |
| Platelet (PLT)           | 205 | Myeloid leukemia                                                               |
| Platelet (PLT)           | 280 | Iron deficiency anemias                                                        |
| Platelet (PLT)           | 287 | Purpura and other hemorrhagic conditions                                       |
| Platelet (PLT)           | 707 | Chronic ulcer of skin                                                          |
| Po2                      | 038 | Septicemia                                                                     |
| Po2                      | 345 | Epilepsy and recurrent seizures                                                |
| Po2                      | 733 | Other disorders of bone and cartilage                                          |
| Po2                      | 279 | Reduction of fracture and dislocation                                          |
| Po2                      | 281 | Repair and plastic operations on joint structures                              |
| Po2                      | 296 | Nonoperative intubation and irrigation                                         |
| Potassium                | 174 | Malignant neoplasm of female breast                                            |
| Potassium                | 276 | Disorders of fluid, electrolyte, and acid-base balance                         |
| Potassium                | 403 | Hypertensive chronic kidney disease                                            |
| Potassium                | 584 | Acute kidney failure                                                           |
| Potassium                | 586 | Renal failure, unspecified                                                     |
| Sodium                   | 253 | Disorders of the pituitary gland and its hypothalamic control                  |
| Sodium                   | 276 | Disorders of fluid, electrolyte, and acid-base balance                         |
| Sodium                   | 584 | Acute kidney failure                                                           |
| Sodium                   | 707 | Chronic ulcer of skin                                                          |
| Troponin T               | 410 | Acute myocardial infarction                                                    |
| White Blood Cells        | 038 | Septicemia                                                                     |
| White Blood Cells        | 204 | Lymphoid leukemia                                                              |
